# Supplementary material
Source: PubMed Central journal article supplement (PMC3141293)
Supplement: NIHMS309649-supplement-suppl_data.pdf [file NIHMS309649-supplement-suppl_data.pdf]

## **SUPPLEMENTARY INFORMATION**

### **Supplementary Figures**

**Figure S1: Multiple deduced amino acid alignment of  $\alpha 1$  domains of *SNC* genes and *XNC* subfamilies.** The alignment of *XNC* subfamilies and *SNC* genes with representative *X. laevis* and *S. tropicalis* class Ia was generated using ClustalX and manually adjusted with GeneDoc v2.5. Black shading indicates identical residues among all sequences. Gray shading indicates similar residues among most sequences. Dotted lines are used to depict the grouping of *SNC* genes into subfamilies and the gene name is illustrated next to the sequence.

**Figure S2: Multiple deduced amino acid alignment of  $\alpha 2$  domains of *SNC* genes and *XNC* subfamilies.** Deduced amino acid sequence alignment of *XNC* subfamilies and *SNC* genes with representative *X. laevis* and *S. tropicalis* class Ia is generated using ClustalX. Alignment is viewed and manually adjusted with GeneDoc v2.5. Shading is as described in Figure S1.

**Figure S3: Nucleotide alignment of  $\alpha 1$  and  $\alpha 2$  domains of *SNC10* RACE-PCR Products.** Alignment of *SNC10* RACE-PCR products was generated using ClustalX and manually adjusted with GeneDoc v2.5 from cDNA made from a pool of 20 *S. tropicalis* larval thymuses and spleen. The sequence labeled 'Genom' represents the original *SNC10* sequence that came from the genome sequencing project. Shading of the alignment is as described in Figure S1.

**Figure S4: Multiple deduced amino acid alignment of  $\alpha 3$  domains of *X. laevis* and *S. tropicalis* class Ia, *SNC* genes and *XNC* subfamilies.** Alignment of  $\alpha 3$  domains of *Xenopodinae* class Ia and class Ib sequences. Black triangles indicate putative  $\beta 2m$  interaction sites and black circles represent putative CD8 interaction sites, modified from (12).



**Fig. S2**

```

      *           20           *           40           *           60           *           80           *
Str_386177 : --GGDRDTHIYQRKAACELRDGGTSGGYQEIAFDGKKEFLIAYDKEKVVYIPSTQEAVMVSHLWNKHYS--STNSKMEMEIDCIQHMKMYLPYISTDLEKK : 95
Xla_XNC1  : ---GNGHIHVYQRKSACELHDDGTIGGYQDIAFDGKKEFLIVFDKERAVYITSTQEAVMVSHLWNKRYD--STDSKMFLEIDCIKHKMYLPYISNDLEKK : 94
Str_386184 : --KSNGNIHIYQRKACELHDDGTIGGYQEIAFDGKDFIVFDKEKVVYVPVTHEAVMVSHLWNKRYD--PTSSKFMETDCIQHMEMYLPYISTDLEKK : 95
Str_386268 : ---DNGDTHIYQTRNACELHDDGTIGGYQEIAFDGKEILVYDKERVVFKPVTHEAVMMSHLWNERYD--STYTEIFMEIDCIEHMKMYLPYISTDLEKK : 94
Xla_XNC4  : ---SNGDIHVYQTMNACELRDGTISGYQEIAFDGKELLVYDKERVTFFVPTQEAVMVAQLWNKRYD--STYTKIFMEIDCIEHMKMYLPYISTDLEKK : 94
Xla_XNC3  : ---GNGHIHVYQRKAACEINDATI DGYQEIAFDGKELLVFDKERVVYVPATHEVVMVSQLWNKLYD--STNNKVFVEIDCIEHMKLYLPYISVEIMKK : 94
Str_386185 : ---GEWDTHIYQRKACELHDDGTIGGYEEIAFDGKKEFFIFDKERVVYVPVPTQEAVMVSHLWNI RYD--PTDSKVYVENDCIEHMKLYLPYIISTDLEKK : 94
Xla_XNC2  : -SKGNEDIHIYQRKSACELHDDGTIGGYQEIAFDGKKEFFIFDKKRVMYLPVSDAVMVSRLWNI RYD--ATDSKHEIENECIEHMKLYLPYIISTDLEKK : 96
Str_386272 : ---G-EDIHVYQRKACERHDDGTVDGYQEIAFDGKELLVFDKERAEYVPVTEEAEMVAHLWNIHYE--SADSKVYVENDCIEHMKLYLPYIISTDLEKK : 93
Str_386297 : --RGKCNNGIYQRFLACELYEDGTIGGYEEIAFDGQELLVYDKERVVYVPVPTQEAEMLSFIWNI RCG--PTDTKIYMENDCIEHMKLYLPYIISTDLERK : 95
Str_386304 : --RGKCNNGIYQRFLACELYEDGTIGGYEEIAFDGQELLVYDKERVVYVPVTHEAEMLSFIWNI CYG--PTDTKIYMENDCIEHMKLYLPYIISTDLERK : 95
Str_182059 : -----GNGNIYQRFLACELYEDGTIGGYEEIAFDGKKEFFSFDKERVVYVPVPTQEAAMLSYLWNI RYD--PTDTKIYMENDCIEHMKLYLPYIISTDLEKK : 92
Str_386302 : ---SDRDTHIYQSFACELHDDGTIGGYQEIAFDGKALIIFDKENVTYVPVPTQEAELVAQLWNKHID--STNTKIYMENDCIEHMKLYLPYIISTDLERK : 94
Str_178628 : --YNGDFHVYQRFFACELHDDGTVSGYEEIAYNGKEVMMFDKVRVVYVPVPTQEVLTMTQQWNIHYND-AKINKIYMENECIHYMKMYLPYIISTDLERK : 96
Str_178629 : --YVNGGFNIYQRFFACELHDDGTVSGYEEIAYNGKEVMMFDKVRVVYVPASQEAALTMTQQWNIHYNH-AKINKIYMENECIQHMKMYLPYLSTDLERK : 96
Xla_XNC6  : --NDRVFBHVYQRFFACQLHDDGTVSGYEEIAYDNGKEVMMFDKVRVVYVPATQEVLTMTQQWNI RHYDH-AKINKIYMENECIQHMKLYLPYISVYLERK : 96
Xla_XNC8  : ---DKGQFHVYQRFFVCELNDDGTISGYEEIALNGKEI IALDKEKVVYVPMQEAALVMDQLNKRYDH-AVDNKMENECIQQIKLYLYL SADLNRK : 95
Str_386267 : ----NGDFHVYQRFFACELHDDGTVSGYEEIAFDGKKEFLIYVFDKERVVYVPVPTQEAALGITELWNI RYD--LQDNKIYLENECIQHMKMYLPYLSTDLERK : 93
Str_386203 : --SGKDAIHVYQTRKACEMHDDGTITAYQEVAFDNGKELIAYDYQGTFTPTTPEAQVVAQIWNKN--Y-AKIEKIFLEKFCNRLSKYINALASDLEKL : 94
Str_458818 : --SGKDAIHVYQTRKACEMHDDGTISAYQEVAFDNGKELIAYDYQMETFTPTTPEAQVVAQIWNED--Y-AKREKIYKLNLCYRFSKYINALASDLEKL : 94
Str_182055 : --SGKDAIHVYQTRKACVMHDDGTISAYQEVAFNGKELIAYDYQMGFTPTTPEAQVAAQVWNED--Y-AKIEKVFLENFCTHRI SWYLPALASHLEKL : 94
Str_386310 : --SGKDAIHVYQTRKACEMHDDGTITAYQEVAFDNGKELIAYDYQGTFTPTTPEAQVVAQIWNEN--Y-VKLEKVFLENYCTHRI STYLPALASDLEKL : 94
Str_182058 : --SGNDAFHIYQMFVGOVQDDGTGTGIYQEVAFDSKELITDYDKHTGTFTPTSQEARIVAQLWNKN--Y-AKVEKIYMENCOTPRIALFPALASDLEKK : 94
Str_386189 : --HD--INYVICTKAAACVLHDDGTVDVYEEVALDNGKELLVFDKERVEFVPATQKAVLLAQLLNKQ-AF-AMEDKIEMENECTQHILTLYLPYIKSYLDEK : 93
Str_386294 : --YD--INYVICTKAAACVLHDDGTVDVYKEVALDNGKELLVFDKERQEFVPATQEAULLAQLLNKQ-AN-AMEDKIEMENECTQHILTLYLPYIKNYLDDK : 93
Str_386240 : --YD--INYVFCIQAACVLHDDGTVDICKDTALDNGKQLLVFDKERVEIVPVTQEAULLAQVWNKQ-GY-AKKYKIEMENECTQHLPSPFPCIKSYLDDK : 93
Str_386261 : --YD--INYVFCIQAACVLHDDGTVDVYEEGALDNGKQLLVFDKETVEFVPVTREAVLLAQVWNKQ-AF-AKKYKIEMENECTQHILTLYLPYIKSYLDDK : 93
Str_386244 : --YD--INHVFCTKAAACVLHDDGTVDVYKEEALDNGKQLLVFDKETMEIVPATGEAAVLAQLLNKQ-AY-PKKYKISMENECTQHLPYLYLYIKNYLDDK : 93
Str_386300 : -----NHVYCTKAAACVLHDDGTVDVYQEVVALDNGKQLLVFDKDLVEFVPATQEAULLTQLWTKHYAN-AKKDKLFLENECTQHILKLYIPYIKSYLDDK : 91
Xla_XNC7  : --YDNRNNHVYQRKIVCELHEHGTVGFYEEVALDNGKELLVFDKEKVAYAPATQEAULLMQLWTKHYAD-AKSNKLFLENECTQQ----- : 81
Str_386246 : --SDRGTIHIYQRKFSCELEEDGTIGGYQEFALDNGREVITFDRENEVFVPATQEAVTMLPRWNIQYLGNI-AKGNKMYMENECIEHMKLYLPIMMDLEKK : 96
Xla_XNC5  : --SDKGAIHVYQRFFACELEEDGTIGGYQEFALDNGKEVITFDRENEVFVSATQEAIVMLPQWNIQYHGN-AKGNKMYMENECIEHMKLYLPITADLQKK : 96
Xla_XNC11 : --SDTGTIHVYQRFNACELHDDGTVGGYVEFALDNGEVITLDREKGVFVPEIQEAVTLIPWNI SKDLCC-AMWNKMYMENDCISYIKLYLP LIANNLEKK : 96
Str_374185 : --DGDGDFHIFCIKYACELLEDSISGKEELALNAKFTFITWNTENPEYI PVVPAALTAQAQKWT--ELY-AKLENDYMEHECVSHLWNIKLYLPYLKDKLEKK : 94
Xla_XNC10 : ---GVEDVHMCIKNGCELEDGSI RGNELAFDAKDYITFDTANPEYI PAVPGALIAVEKRR--ELY-SKLQPTVYVENVCI SQLKHLIPYLKNVLEKK : 93
Str_386214 : --YGSADIHVYQKRFICELDDGSGVGGYQEAFFDNGESFATFDKEKGVFVPLTQKASDVIQQCANCPLY-AKSDKRYMENYCIHDKLYLPYLIKMLDDK : 96
Str_386241 : AGEGNHHVHVYQRKYICELQDSGKVLGNIHAFVFNNGKEVIAFDRENEVFVIMPEAELLIPSWNI-KYLDVVKHKKAYLKNVCI EHKLYLSYMLPELDRK : 98
Xla_FF    : ---G---THMVQWMYGCELDGDSIRGYEQHVYDGRFFALDTEEWVYVPSVREAQLTTQKWN SPEVNAPERNNYLNQNICIEGLKRYLSYGQAELERR : 93
Xla_JJ    : ---G---THSLQMMCGCELREDNSIRGYNQYGDGKEFLI ALDTERSVMYVPTVREAQLTEQKWN SPEVNKPERDNNYLNQNICIEWLKRYLSYGQAELERR : 93
Str_UAA*01 : ---G---THSLQWMYGCELREDGSTRGYEQFGYDGRFLMALDTERWRYVPSMREAQLSTQKWN SPEVNEPERERNYLNQNICIPALKRYLGYGQAELERR : 93
Str_UAA*02 : ---G---THIVQSMYGCELREDGSTRGYEQDGYDGRFFALDTERWVYVPSMREAQLTTQKWN SPEVNEPERERNYLNQNICIEWLKRYLGYGQAELERR : 93
      Q           C           dg           y           a           lg           l           p           ea           wn           6           n           C           l

```



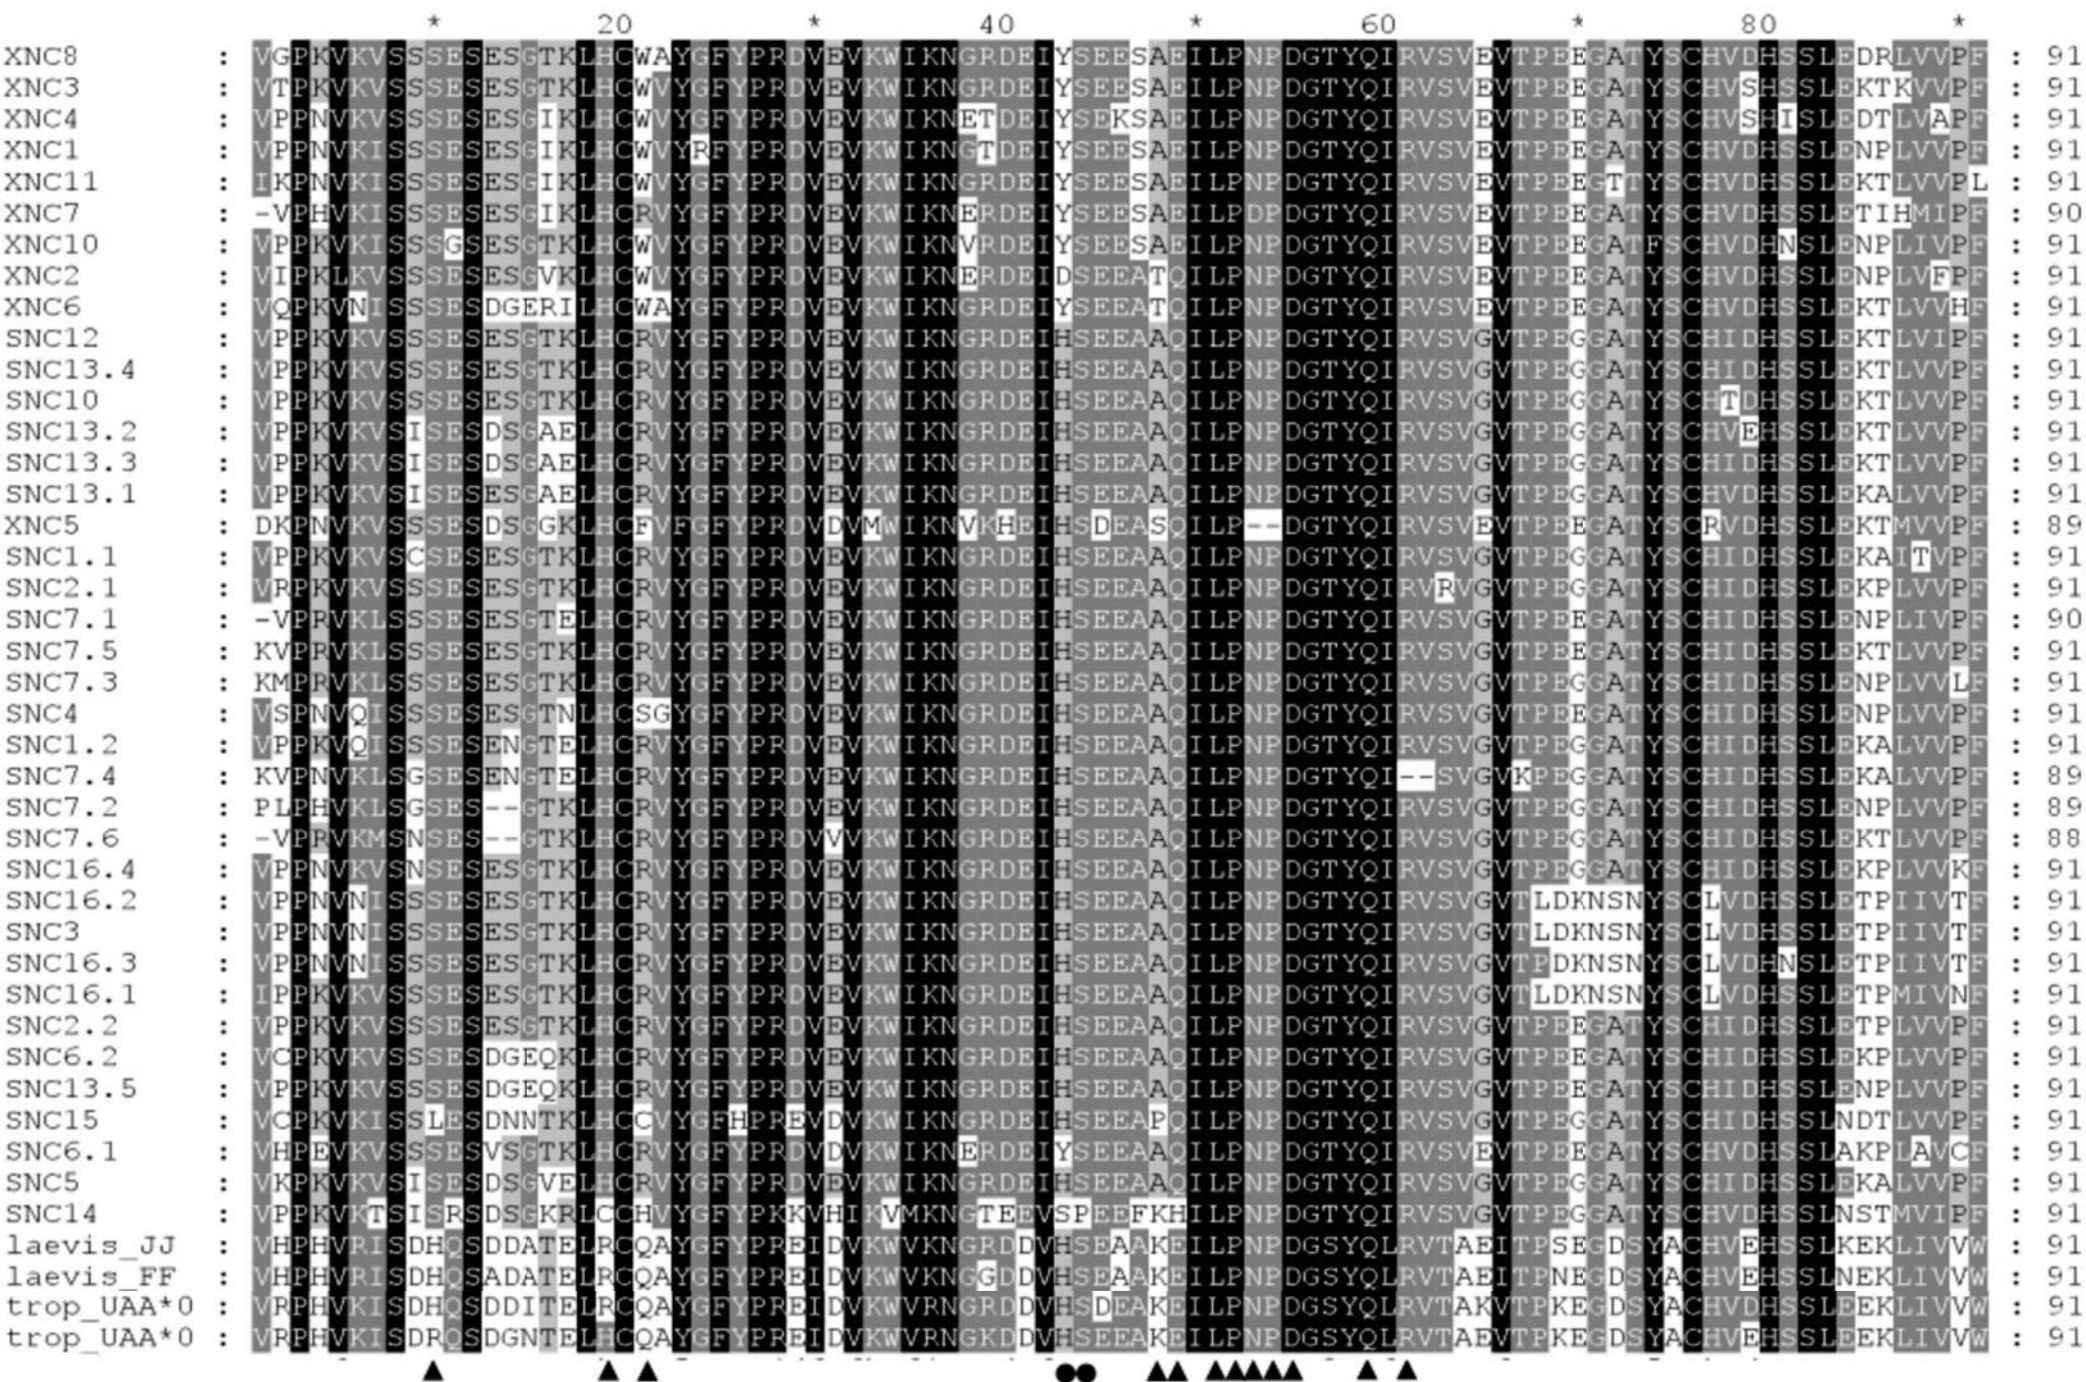

Fig. S4

**Table SI:** List of accession numbers for MHC class I sequences used in Figure 4

**Sequence Name      Accession Number**

***Xenopus laevis* (African clawed frog)**

|                                    |          |
|------------------------------------|----------|
| GG (class Ia – <i>g</i> haplotype) | AF185579 |
| RR (class Ia – <i>r</i> haplotype) | AF185582 |
| FF (class Ia – <i>f</i> haplotype) | AAF03402 |
| JJ (class Ia – <i>j</i> haplotype) | AF185586 |
| XNC1                               | M58019   |
| XNC2                               | L20725   |
| XNC3                               | L20726   |
| XNC4                               | L20727   |
| XNC5                               | L20728   |
| XNC6                               | L20729   |
| XNC7                               | L20730   |
| XNC8                               | L20731   |
| XNC9                               | L20732   |
| XNC10                              | FJ589642 |
| XNC11                              | FJ589643 |

***Xenopus laevis* x *Xenopus gilli* (hybrid clone)**

|         |          |
|---------|----------|
| LG-ac-1 | AF185583 |
| LG-ac-2 | AF185585 |
| LG-bd-1 | AF185581 |
| LG-bd-2 | AF185584 |

***Homo sapiens* (human)**

|          |              |
|----------|--------------|
| HLA-A2   | Z30341       |
| HLA-B    | U11265       |
| HLA-C    | X58536       |
| HLA-E    | NM_005516    |
| HLA-F    | NM_001098479 |
| HLA-G    | NM_002127    |
| HLA-H    | U60319       |
| hum_CD1a | NM_001763    |
| hum_CD1b | NM_001764    |
| hum_CD1c | CR457080     |
| hum_CD1e | X14975       |
| hum_CD1d | NM_001766    |
| hum_MICA | AJ563426     |
| hum_MR1  | AJ249778     |
| hum_FcRn | AF220542     |

***Pan troglodytes* (chimpanzee)**

|             |              |
|-------------|--------------|
| Patr-MICA/B | NM_001045494 |
|-------------|--------------|

***Pongo pygmaeus* (Bornean orangutan)**

Popy-BAB      M30681

***Macaca fascicularis* (crab-eating macaque)**

|         |        |
|---------|--------|
| Mafa_E1 | U02976 |
| Mafa_E2 | U02977 |

***Macaca fascicularis* (cattle)**

|            |        |
|------------|--------|
| Bota-BL3-6 | M21044 |
|------------|--------|

***Ovis aries* (sheep)**

|        |        |
|--------|--------|
| Ovar-E | M34676 |
|--------|--------|

***Macropus rufogriseus* (red-necked wallaby)**

|          |        |
|----------|--------|
| Maru-UA1 | L04950 |
| Maru-UB1 | L04952 |

***Monodelphis domestica* (gray short-tailed opossum)**

|          |              |
|----------|--------------|
| Modo-UA1 | NM_001044223 |
| Modo-UG  | DQ138606     |
| Modo-3   | AF125540     |

***Mus musculus* (house mouse)**

|           |           |
|-----------|-----------|
| H2-K      | X01815    |
| mus_H-2Dd | U47326    |
| mus_TL    | D14027    |
| mus_MR1   | NM_008209 |
| mus_H2-M3 | U18797    |
| mus_Qa-2  | D90146    |
| mus_Q4    | M18837    |
| mus_Q10k  | X16426    |
| mus_T23   | Y00629    |
| mus_CD1d  | NM_007639 |

***Mus spretus* (western wild mouse)**

|             |        |
|-------------|--------|
| mussp_H2-M3 | L36072 |
|-------------|--------|

***Rattus rattus* (black rat)**

|          |        |
|----------|--------|
| rat_FcRn | X14323 |
|----------|--------|

***Gallus gallus* (chicken)**

|           |              |
|-----------|--------------|
| ch_BF19   | M84766       |
| ch_BFw-02 | AB178043     |
| ch_RfpY   | AF218783     |
| ch_CD1.2  | NM_001024582 |
| ch_CD1.1  | AY849319     |

***Coturnix japonica* (Japanese quail)**

|            |  |
|------------|--|
| quail_QF41 |  |
|------------|--|

***Ameiva ameiva* (lizard)**

|          |        |
|----------|--------|
| Amam-LCI | M81094 |
|----------|--------|

***Rana pipiens* (northern leopard frog)**

|         |          |
|---------|----------|
| Rapi-R6 | AF185587 |
| Rapi-R9 | AF185588 |

***Ambystoma mexicanum* (axolotl)**

Amme\_Ia3 U83137

Amme\_Ia4 U83138

**Latimeria chalumnae (coelacanth)**

Lach\_UB1 U08034

**Cyprinus carpio (common carp)**

Cyca-UA1\*01 X91015

Cyca-UAW1 X91022

Cyca-ZE AJ420957

Cyca-NEW AB018581

Cyca-ZA1 M37107

Cyca-ZB1 L10420

Cyca-ZC1 L10421

**Oncorhynchus mykiss (rainbow trout)**

Onmy\_UAA L63541

Onmy\_UBA AF091785

Onmy-UCA AY523659

Onmy-UDA AY523666

Onmy-C32 U55380

**Carassius auratus (goldfish)**

Caau-ZA1 L10418

**Danio rerio (zebrafish)**

Dare-UAA01 Z46776

Dare-UBA01 Z46777

**Takifugu rubripes (Fugu rubripes)**

Furu-I2 AF001216

**Salmo salar (Atlantic salmon)**

Sasa-UBA101 AF504019

**Ginglymostoma cirratum (nurse shark)**

Gici\_UAA\*01 AF220063

Gici-11 AF028557

Gici-NC1 AF357923

**Heterodontus francisci (horn shark)**

Hefr-19 AF028558

Hefr-20 AF028559

**Triakis scyllium (banded houndshark)**

Trsc-UAA\*101 AF034316

Trsc-UBA\*201 AF034345
